# Supplementary material for: Cellulose nanomaterial metrology: microscopy measurements
Source: Royal Society of Chemistry journal article supplement (doi:10.1039/d4nr02276a), 2024-01-01
Supplement: d4nr02276a1.pdf [file d4nr02276a1.pdf]

## Supporting Information

### **Cellulose nanomaterial metrology: microscopy measurements**

Linda J. Johnston<sup>1</sup>

Metrology Research Center, National Research Council Canada, Ottawa, ON Canada K1A 0R6

**Table 1.** Particle size measurements for CNCs using imaging methods. Industrial sources are noted by company name and lab synthesized materials are noted with brief details on cellulose source and surface chemistry (sulfated vs carboxylated). If not noted, the samples were generated from wood pulp using sulfuric acid, giving sulfate half ester groups on the surface. References numbers are from the review.

| Sample source                  | Method             | Length, distribution breadth (nm) <sup>1</sup> | Cross section, distribution breadth (nm) <sup>1</sup> | Number of particles   | Reference |
|--------------------------------|--------------------|------------------------------------------------|-------------------------------------------------------|-----------------------|-----------|
| Lab made (various conditions)  | TEM                | 130.5 to 281.2 (9 samples)                     | nd                                                    | 50-350                | 65        |
| CelluForce CNC                 | AFM-1 <sup>2</sup> | 91.0, 32.4                                     | 4.19, 1.17                                            | 300                   | 34        |
| CelluForce CNC                 | AFM-2 <sup>2</sup> | 87.6, 28.4                                     | 4.35, 1.30                                            | 285                   | 34        |
| CelluForce CNC                 | TEM-1 <sup>2</sup> | 66.5, 26.5                                     | 8.0, 1.8                                              | 411                   | 34        |
| CelluForce CNC                 | TEM-2 <sup>2</sup> | 75.2, 26.9                                     | 7.1, 1.5                                              | 287                   | 34        |
| Lab made (sulfated)            | AFM                | nd                                             | 4.0, 0.34 <sup>3</sup>                                | 300                   | 69        |
| Lab made (sulfated)            | TEM                | 163, 0.426 <sup>3</sup>                        | nd                                                    | 250                   | 69        |
| Innventia AB (carboxylated)    | AFM                | nd                                             | 3.2, 0.35                                             | 300                   | 69        |
| Innventia AB (carboxylated)    | TEM                | 328, 0.42                                      | nd                                                    | 250                   | 69        |
| Lab made (bacterial cellulose) | AFM                | 520                                            | 6.7, 2.5                                              | >1000 (height)        | 55        |
| Lab made (carboxymethylated)   | AFM                | 310                                            | 5.0, 2.0                                              | >1000 (height)        | 55        |
| Lab made (sulfated)            | AFM                | 200                                            | 7.0, 2.7                                              | >1000 (height)        | 55        |
| CNCD-1 <sup>4</sup>            | AFM-1 <sup>2</sup> | 76, 32                                         | 3.4, 1.1                                              | 1567                  | 15        |
| CNCD-1 <sup>4</sup>            | AFM-2 <sup>2</sup> | 78, 30                                         | 3.7, 1.2                                              | 1546                  |           |
| CNCD-1 <sup>4</sup>            | TEM-1 <sup>5</sup> | 82, 36                                         | 7.5, 2                                                | 1909                  | 15        |
| CNCD-1 <sup>4</sup>            | TEM-2 <sup>5</sup> | 92, 33                                         | 7.2, 1.6                                              | 600                   |           |
| Lab made (wood, sulfated)      | AFM                | 116, 67                                        | nd                                                    | 250-300               | 54        |
| Lab made (cotton, sulfated)    | AFM                | 130, 60                                        | nd                                                    | 250-300               | 54        |
| CNCD-1 <sup>4</sup>            | AFM                | nd                                             | 3.5, 1.1                                              | 321                   | 70        |
| CNCD-1 <sup>4</sup>            | AFM                | 94.5, 39.6                                     | 3.44, 1.21                                            | ILC data <sup>6</sup> | 50        |
| CNCD-1 <sup>4</sup>            | TEM                | 95.8, 39.0                                     | 7.65, 2.20                                            | ILC data <sup>6</sup> | 64        |
| Lab made (filter paper)        | AFM                | 132, 55                                        | 8, 3                                                  | ≥ 100                 | 53        |
| CelluForce                     | AFM                | 183, 88                                        | 6, 2                                                  | ≥ 100                 | 53        |
| Alberta Innovates              | AFM                | 134, 56                                        | 8, 2                                                  | ≥ 100                 | 53        |
| Forest Products Lab            | AFM                | 134, 52                                        | 7, 2                                                  | ≥ 100                 | 53        |
| Lab made (filter paper)        | AFM                | 190, 40                                        | 8, 2                                                  | 100                   | 52        |
| Noram                          | AFM                | 160, 30                                        | 5, 1                                                  | 100                   | 52        |
| Melodea                        | AFM                | 210, 60                                        | 4, 1                                                  | 100                   | 52        |
| Anomera                        | AFM                | 150, 30                                        | 5, 2                                                  | 100                   | 52        |
| Blue Goose Biorefineries       | AFM                | 210, 50                                        | 5, 2                                                  | 100                   | 52        |

|                                            |     |                        |                        |       |    |
|--------------------------------------------|-----|------------------------|------------------------|-------|----|
| CelluForce CNC                             | AFM | 118.1, 45.9            | 4.3, 1.5               | nd    | 66 |
| CelluForce CNC                             | TEM | 141.5, 60.0            | 12.8, 3.1              | nd    | 66 |
| U Maine CNC                                | AFM | 101.1, 34.4            | 4.9, 1.7               | nd    | 66 |
| U Maine CNC                                | TEM | 88.9, 37.5             | 6.2, 1.6               | nd    | 66 |
| CelluForce (20 kJ/g/L sonication energy)   | AFM | nd                     | 4.8, 0.1               | > 139 | 40 |
| CelluForce (3063 kJ/g/L sonication energy) | AFM | nd                     | 4.4, 0.1               | > 139 | 40 |
| Lab made (cotton, sulfated)                | AFM | 189, 0.31 <sup>3</sup> | 6.8, 0.18 <sup>3</sup> | ≥ 100 | 58 |
| Lab made (cotton, carboxylated)            | AFM | 277, 0.27 <sup>3</sup> | 8.0, 0.34 <sup>3</sup> | ≥ 100 | 58 |
| Lab made (cotton-sulfate, carboxyl)        | AFM | 203, 0.27 <sup>3</sup> | 7.8, 0.38 <sup>3</sup> | ≥ 100 | 58 |
| Bacterial CNC-batch 1                      | AFM | 382, 0.36 <sup>3</sup> | 6.9, 0.27 <sup>3</sup> | ≥ 100 | 58 |
| Bacterial CNC-batch 2                      | AFM | 370, 0.41 <sup>3</sup> | 7.8, 0.38 <sup>3</sup> | ≥ 100 | 58 |

<sup>1</sup>Data are presented as mean and standard deviation as a measure of distribution breadth, unless otherwise noted. Cross section is the measured width for TEM and the measured height for AFM unless otherwise noted. Cases where data was not measured or not reported are indicated by “nd”.

<sup>2</sup> data obtained by two analysts for a single data set

<sup>3</sup> data are mean and polydispersity obtained for a log normal fit of data

<sup>4</sup> CNC-D-1 is a certified reference material characterized and released by NRC and obtained from CelluForce

<sup>5</sup> TEM data for 2 different laboratories

<sup>6</sup> ILC data is presented as the overall consensus value obtained from data from 10 laboratories all measuring samples prepared in a single laboratory. The number of particles analyzed varies from 355 to 620 for AFM (with one exception of 125 particles) and from 232 to 1179 for TEM. Overdispersion values which provide a measure of uncertainty in the measurement are 15 nm and 0.28 nm (AFM length, height) and 12.3 nm and 0.78 nm (TEM length, width).

**Table 2.** Particle size measurements for iCNFs using imaging methods. Samples are all prepared by TEMPO-mediated oxidation of wood pulp (carboxylated) in the authors' laboratory unless otherwise noted. Details on differences in sample preparation (surface charge, sonication) are provided for some samples. References numbers are from the review.

| Sample source                                       | Method           | Length, distribution breadth (nm) <sup>1</sup>               | Cross section, distribution breadth (nm) <sup>1</sup> | Number of particles        | Reference |
|-----------------------------------------------------|------------------|--------------------------------------------------------------|-------------------------------------------------------|----------------------------|-----------|
| iCNF                                                | AFM              | 511, 0.77 <sup>2</sup>                                       | 2.35                                                  | 2380                       | 29        |
| iCNF                                                | AFM-             |                                                              | 2.0, 0.6                                              | 100                        | 16        |
| iCNF                                                | AFM              |                                                              | 2.2, 0.8                                              | 100                        | 16        |
| iCNF                                                | AFM              |                                                              | 2.9, 0.9                                              | 100                        | 16        |
| iCNF (low charge)                                   | AFM              | 3900                                                         | 3.3, 1.2                                              | >1000 (length)             | 55        |
| iCNF (high charge)                                  | AFM              | 860                                                          | 3.3, 1.2                                              | >1000 (length)             | 55        |
| iCNF (carboxy-methylation)                          | AFM              | 1700                                                         | 2.9, 1.2                                              | >1000 (length)             | 55        |
| iCNF                                                | AFM              | 800, 376                                                     | 18.5, 4.5 <sup>3</sup>                                | 100 (length)<br>50 (width) | 81        |
| iCNF (deinked paper)                                | AFM              | 724, 391                                                     | 20, 6.1 <sup>3</sup>                                  | 100 (length)<br>50 (width) | 81        |
| iCNF (380 μmol/g) <sup>4</sup>                      | TEM              | 614                                                          |                                                       | ~200                       | 77        |
| iCNF (1360 μmol/g) <sup>4</sup>                     | TEM              | 419                                                          |                                                       | ~200                       | 77        |
| iCNF (380 μmol/g) <sup>4</sup>                      | AFM              |                                                              | 2.14                                                  | ~150                       | 77        |
| iCNF (1360 μmol/g) <sup>4</sup>                     | AFM              |                                                              | 2.47                                                  | ~150                       | 77        |
| iCNF (8 samples, varying fibrillation)              | AFM              |                                                              | 2.4 – 2.6 nm                                          | ~50                        | 76        |
| iCNF (total length)                                 | AFM              | 1300 (0 s sonication)<br>400 (400 s sonication) <sup>5</sup> |                                                       | 240                        | 80        |
| iCNF (segment length)                               | AFM              | 300 (0 s sonication)<br>150 (400 s sonication) <sup>5</sup>  |                                                       | 240                        | 80        |
| iCNF (150 μmol/g) <sup>4</sup>                      | AFM              | 493                                                          |                                                       | >200                       | 79        |
| iCNF (650 μmol/g) <sup>4</sup><br>5 min sonication  | AFM              | 482                                                          |                                                       | >200                       | 79        |
| iCNF (650 μmol/g) <sup>4</sup><br>25 min sonication | AFM              | 335                                                          |                                                       | >200                       | 79        |
| iCNF (940 μmol/g) <sup>4</sup>                      | AFM              | 294                                                          |                                                       | >200                       | 79        |
| Tunicate CNF                                        | AFM <sup>6</sup> |                                                              | 3.0, 1.5 <sup>6</sup><br>7.4, 2.0<br>13.0, 2.9        |                            | 75        |

<sup>1</sup>Data are presented as mean and standard deviation as a measure of distribution breadth, unless otherwise noted. Cross section is the measured height for AFM unless otherwise noted

<sup>2</sup>Polydispersity from log normal fit

<sup>3</sup> AFM width, no deconvolution

<sup>4</sup> Charge density in brackets

<sup>5</sup> Data estimated from graph

<sup>6</sup> Three component fit

**Table 3.** Particle size measurements for CNFs using imaging methods. Brief descriptions of the sample preparation conditions are included; see references for additional details. References numbers are from the review.

| CNF sample source                                                                                      | Method                | Length, distribution breadth ( $\mu\text{m}$ ) <sup>1</sup> | Cross section, distribution breadth (nm) <sup>1</sup> | Number of particles | Reference |
|--------------------------------------------------------------------------------------------------------|-----------------------|-------------------------------------------------------------|-------------------------------------------------------|---------------------|-----------|
| Bleaching, grinding of carrot agricultural waste                                                       | AFM <sup>2</sup>      |                                                             | 12, 8                                                 | 40                  | 98        |
| Bleaching, grinding of beer production waste                                                           | AFM-                  |                                                             | 30, 13                                                | 40                  | 98        |
| Birch pulp, fluidizer, centrifugation 3 processing conditions                                          | AFM <sup>3</sup>      |                                                             | 4.2, 2.7<br>5.6, 3.2<br>19.5, 13.2                    | 505<br>523<br>631   | 88        |
| Softwood bleached Kraft fiber, grinder (2 samples)                                                     | SEM                   | CNF-50: 6.7, 5.6<br>CNF-80: 6.8, 4.7                        | CNF-50: 64, 29<br>CNF-80: 85, 40.5                    | 101<br>92           | 90        |
| Softwood bleached Kraft fiber, grinder (2 samples)                                                     | TEM <sup>4</sup>      | nd                                                          | 49.92, 43.69<br>83.23, 57.02                          | nd                  | 90        |
| Bleached birch pulp; 6 passes of fluidizer                                                             | AFM <sup>5</sup>      |                                                             | Height: 6, 3<br>Width: 67, 18                         | 500                 | 87        |
| Bleached birch pulp; 6 passes of fluidizer                                                             | Negative contrast SEM | 1.46, 0.8                                                   | 35, 12                                                | 200                 | 87        |
| Bleached eucalyptus pulp, mechanically refined, 1 or 3 homogenization passes <sup>6</sup>              | FEG-SEM               |                                                             | 53, 85 (one pass)<br>12, 15 (three passes)            | 899<br>4723         | 94        |
| Eucalyptus pulp, mill refined and homogenized (two samples) <sup>6</sup>                               | FEG-SEM               |                                                             | 26, 27 (less processed)<br>17, 15 (more processed)    | 2946<br>4723        | 86        |
| CNF from aqueous counter collision using bacteria (a), hardwood (b) and microcrystalline cellulose (c) | AFM                   | 4.0, 2.3 (a)<br>4.2, 2.4 (b)<br>2.5, 1.7 (c)                |                                                       | nd                  | 99        |
| Bleached softwood pulp; supermass collider                                                             | FE-SEM                | 1.2, 0.4                                                    | 38.8, 14.8                                            | nd                  | 97        |

<sup>1</sup>Data are presented as mean and standard deviation as a measure of distribution breadth, unless otherwise noted. Cross section is the measured height for AFM or the measured width for TEM/SEM, unless otherwise noted. Studies lacking some data or particle number information are noted as “nd”.

<sup>2</sup> SEM length histograms shown but no quantitative data

<sup>3</sup> fractionated by sequential centrifugation to give three samples with differing fibril sizes

<sup>4</sup> Node to node length and number of branches per node were also measured; see text in CNF section

<sup>5</sup> AFM data is for CNF on a polymer-coated mica. The width decreases for CNF after deconvolution and when deposited on bare mica but in both cases is still larger than the measured height .

<sup>6</sup> Additional data on other sample preparation and image collection conditions and median, skewness, etc for particle diameter distributions are available in references 86 and 94.
